# Supplementary material
Source: PubMed Central journal article supplement (PMC6193388)
Supplement: zam021188809s1.pdf [file zam021188809s1.pdf]

## SUPPLEMENTAL FILE 1

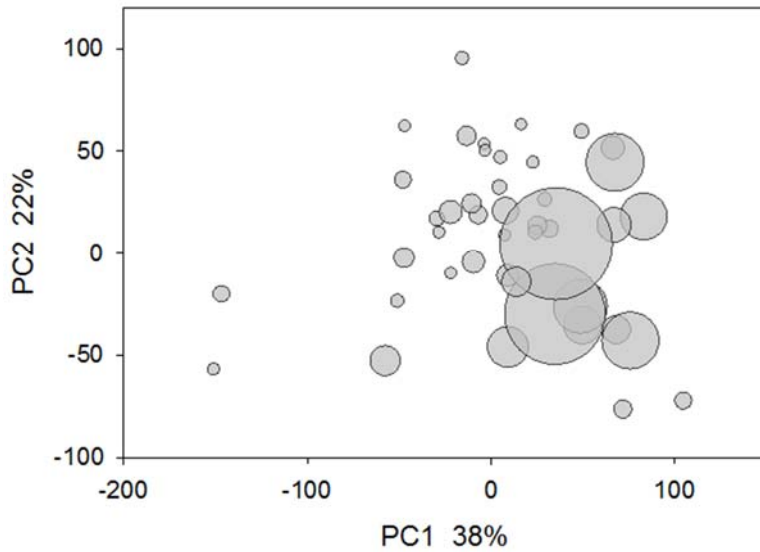

**Fig. S1.** Principal Coordinate Analysis based on KEGG level 2 functional categories. Datapoints located in close proximity have functionally similar metagenomes. The size of the circles is proportional to oocyst concentration. Metagenome gene abundance from experiment 2 was inferred from 16S sequence data using PICRUSt for 44 fecal samples analyzed by 16S amplicon sequencing and by flow cytometry.

**Table S2** Metagenomic differences grouped by KEGG level 2 pathways between severely infected and mildly infected mice.

| <b>Group</b>                        | <b>KEGG pathway</b>                  | <b>log(abundance)</b>   | <b>LDA score</b> | <b>p</b> |
|-------------------------------------|--------------------------------------|-------------------------|------------------|----------|
| Severely infected                   | Poorly Characterized                 | 4.704                   | 2.80             | 0.034    |
|                                     | Cellular Processes and Signaling     | 4.629                   | 3.23             | 0.001    |
|                                     | Metabolism of Cofactors and Vitamins | 4.592                   | 2.96             | 0.041    |
|                                     | Cell Motility                        | 4.540                   | 3.59             | 0.001    |
|                                     | Genetic Information Processing       | 4.466                   | 2.92             | 0.010    |
|                                     | Metabolism unclassified              | 4.439                   | 2.71             | 0.002    |
|                                     | Folding Sorting and Degradation      | 4.341                   | 2.67             | 0.023    |
|                                     | Signal Transduction                  | 4.332                   | 3.28             | 0.000    |
|                                     | Glycan Biosynthesis and Metabolism   | 4.306                   | 2.86             | 0.002    |
|                                     | Infectious Diseases                  | 3.656                   | 2.61             | 0.001    |
|                                     | Circulatory System                   | 0.665                   | 2.11             | 0.008    |
|                                     | Cardiovascular Diseases              | 0.148                   | 2.60             | 0.008    |
|                                     | Mildly infected                      | Carbohydrate Metabolism | 5.039            | 3.59     |
| Amino Acid Metabolism               |                                      | 4.939                   | 2.89             | 0.016    |
| Replication and Repair              |                                      | 4.924                   | 3.38             | 0.003    |
| Translation                         |                                      | 4.722                   | 3.27             | 0.002    |
| Nucleotide Metabolism               |                                      | 4.586                   | 3.04             | 0.005    |
| Lipid Metabolism                    |                                      | 4.484                   | 2.91             | 0.002    |
| Xenobiotics Biodegrad. & Metabolism |                                      | 4.336                   | 3.05             | 0.003    |
| Metabolism of other Amino Acids     |                                      | 4.200                   | 2.53             | 0.028    |
| Cell Growth and Death               |                                      | 3.685                   | 2.38             | 0.001    |
| Signaling Molecules and Interaction |                                      | 3.353                   | 2.25             | 0.001    |
